# Supplementary material for: Toxicity and bioaccumulation of Cadmium, Copper and Zinc in a direct comparison at equitoxic concentrations in common carp (Cyprinus carpio) juveniles
Source: PLoS One. 2020 Apr 9;15(4):e0220485. doi: 10.1371/journal.pone.0220485 (PMC7145017; doi:10.1371/journal.pone.0220485)
Supplement: S1 Data — (XLSX) [file pone.0220485.s001.xlsx]

## Sheet: DoseResponseCurves
Toxicity and bioaccumulation of Cadmium, Copper and Zinc in a direct comparison at equitoxic concentrations in common carp (Cyprinus carpio) juveniles
Vyshal Delahaut, Božidar Rašković, Marta Satorres Salvado, Lieven Bervoets, Ronny Blust, Gudrun De Boeck
24h			48h			72h			120h			144h			168h			192h			216h			240h
Conc_µg/L	Mortality_perc	Element	Conc_µg/L	Mortality_perc	Element	Conc_µg/L	Mortality_perc	Element	Conc_µg/L	Mortality_perc	Element	Conc_µg/L	Mortality_perc	Element	Conc_µg/L	Mortality_perc	Element	Conc_µg/L	Mortality_perc	Element	Conc_µg/L	Mortality_perc	Element	Conc_µg/L	Mortality_perc	Element
18.58	0	Cu	18.58	0	Cu	18.58	0	Cu	18.58	0	Cu	18.58	0	Cu	18.58	0	Cu	18.58	0	Cu	18.58	0	Cu	0.29	0	Cu
18.58	0	Cu	18.58	0	Cu	18.58	0	Cu	18.58	0	Cu	18.58	0	Cu	18.58	0	Cu	18.58	0	Cu	18.58	0	Cu	0.29	0	Cu
34.12	0	Cu	34.12	0	Cu	34.12	0	Cu	34.12	0	Cu	34.12	0	Cu	34.12	0	Cu	34.12	0	Cu	34.12	0	Cu	0.54	0	Cu
34.12	0	Cu	34.12	0	Cu	34.12	0	Cu	34.12	0	Cu	34.12	0	Cu	34.12	0	Cu	34.12	0	Cu	34.12	0	Cu	0.54	0	Cu
48.11	0	Cu	48.11	0	Cu	48.11	60	Cu	48.11	60	Cu	48.11	60	Cu	48.11	60	Cu	48.11	60	Cu	48.11	60	Cu	0.76	60	Cu
48.11	0	Cu	48.11	20	Cu	48.11	40	Cu	48.11	40	Cu	48.11	40	Cu	48.11	40	Cu	48.11	40	Cu	48.11	40	Cu	0.76	40	Cu
63.64	0	Cu	63.64	40	Cu	63.64	60	Cu	63.64	60	Cu	63.64	60	Cu	63.64	60	Cu	63.64	60	Cu	63.64	60	Cu	1	60	Cu
63.64	0	Cu	63.64	80	Cu	63.64	100	Cu	63.64	100	Cu	63.64	100	Cu	63.64	100	Cu	63.64	100	Cu	63.64	100	Cu	1	100	Cu
74.57	0	Cu	74.57	60	Cu	74.57	100	Cu	74.57	100	Cu	74.57	100	Cu	74.57	100	Cu	74.57	100	Cu	74.57	100	Cu	1.17	100	Cu
74.57	0	Cu	74.57	100	Cu	74.57	100	Cu	74.57	100	Cu	74.57	100	Cu	74.57	100	Cu	74.57	100	Cu	74.57	100	Cu	1.17	100	Cu
154.71	100	Cu	154.71	100	Cu	154.71	100	Cu	154.71	100	Cu	154.71	100	Cu	154.71	100	Cu	154.71	100	Cu	154.71	100	Cu	2.43	100	Cu
154.71	100	Cu	154.71	100	Cu	154.71	100	Cu	154.71	100	Cu	154.71	100	Cu	154.71	100	Cu	154.71	100	Cu	154.71	100	Cu	2.43	100	Cu
274.19	100	Cu	274.19	100	Cu	274.19	100	Cu	274.19	100	Cu	274.19	100	Cu	274.19	100	Cu	274.19	100	Cu	274.19	100	Cu	4.31	100	Cu
274.19	100	Cu	274.19	100	Cu	274.19	100	Cu	274.19	100	Cu	274.19	100	Cu	274.19	100	Cu	274.19	100	Cu	274.19	100	Cu	4.31	100	Cu
414.99	100	Cu	414.99	100	Cu	414.99	100	Cu	414.99	100	Cu	414.99	100	Cu	414.99	100	Cu	414.99	100	Cu	414.99	100	Cu	6.53	100	Cu
414.99	100	Cu	414.99	100	Cu	414.99	100	Cu	414.99	100	Cu	414.99	100	Cu	414.99	100	Cu	414.99	100	Cu	414.99	100	Cu	6.53	100	Cu
511.95	100	Cu	511.95	100	Cu	511.95	100	Cu	511.95	100	Cu	511.95	100	Cu	511.95	100	Cu	511.95	100	Cu	511.95	100	Cu	8.06	100	Cu
511.95	100	Cu	511.95	100	Cu	511.95	100	Cu	511.95	100	Cu	511.95	100	Cu	511.95	100	Cu	511.95	100	Cu	511.95	100	Cu	8.06	100	Cu
684.9	100	Cu	684.9	100	Cu	684.9	100	Cu	684.9	100	Cu	684.9	100	Cu	684.9	100	Cu	684.9	100	Cu	684.9	100	Cu	10.78	100	Cu
684.9	100	Cu	684.9	100	Cu	684.9	100	Cu	684.9	100	Cu	684.9	100	Cu	684.9	100	Cu	684.9	100	Cu	684.9	100	Cu	10.78	100	Cu
15.5	0	Cd	15.5	0	Cd	15.5	0	Cd	15.5	0	Cd	15.5	0	Cd	15.5	0	Cd	15.5	0	Cd	15.5	0	Cd	0.14	0	Cd
15.5	0	Cd	15.5	0	Cd	15.5	0	Cd	15.5	0	Cd	15.5	0	Cd	15.5	0	Cd	15.5	0	Cd	15.5	0	Cd	0.14	0	Cd
41.44	0	Cd	41.44	20	Cd	41.44	40	Cd	41.44	100	Cd	41.44	100	Cd	41.44	100	Cd	41.44	100	Cd	41.44	100	Cd	0.37	100	Cd
41.44	0	Cd	41.44	20	Cd	41.44	20	Cd	41.44	100	Cd	41.44	100	Cd	41.44	100	Cd	41.44	100	Cd	41.44	100	Cd	0.37	100	Cd
69.82	0	Cd	69.82	0	Cd	69.82	40	Cd	69.82	80	Cd	69.82	100	Cd	69.82	100	Cd	69.82	100	Cd	69.82	100	Cd	0.62	100	Cd
69.82	0	Cd	69.82	0	Cd	69.82	20	Cd	69.82	80	Cd	69.82	100	Cd	69.82	100	Cd	69.82	100	Cd	69.82	100	Cd	0.62	100	Cd
103.9	0	Cd	103.9	0	Cd	103.9	80	Cd	103.9	100	Cd	103.9	100	Cd	103.9	100	Cd	103.9	100	Cd	103.9	100	Cd	0.92	100	Cd
103.9	0	Cd	103.9	0	Cd	103.9	40	Cd	103.9	80	Cd	103.9	80	Cd	103.9	80	Cd	103.9	80	Cd	103.9	80	Cd	0.92	80	Cd
294.78	0	Cd	294.78	40	Cd	294.78	60	Cd	294.78	100	Cd	294.78	100	Cd	294.78	100	Cd	294.78	100	Cd	294.78	100	Cd	2.62	100	Cd
294.78	0	Cd	294.78	20	Cd	294.78	40	Cd	294.78	100	Cd	294.78	100	Cd	294.78	100	Cd	294.78	100	Cd	294.78	100	Cd	2.62	100	Cd
649.8	0	Cd	649.8	40	Cd	649.8	60	Cd	649.8	80	Cd	649.8	80	Cd	649.8	80	Cd	649.8	80	Cd	649.8	80	Cd	5.78	80	Cd
649.8	0	Cd	649.8	60	Cd	649.8	80	Cd	649.8	100	Cd	649.8	100	Cd	649.8	100	Cd	649.8	100	Cd	649.8	100	Cd	5.78	100	Cd
1217.76	0	Cd	1217.76	80	Cd	1217.76	100	Cd	1217.76	100	Cd	1217.76	100	Cd	1217.76	100	Cd	1217.76	100	Cd	1217.76	100	Cd	10.83	100	Cd
1217.76	0	Cd	1217.76	20	Cd	1217.76	40	Cd	1217.76	100	Cd	1217.76	100	Cd	1217.76	100	Cd	1217.76	100	Cd	1217.76	100	Cd	10.83	100	Cd
1427.59	0	Cd	1427.59	40	Cd	1427.59	60	Cd	1427.59	80	Cd	1427.59	100	Cd	1427.59	100	Cd	1427.59	100	Cd	1427.59	100	Cd	12.7	100	Cd
1427.59	0	Cd	1427.59	40	Cd	1427.59	60	Cd	1427.59	100	Cd	1427.59	100	Cd	1427.59	100	Cd	1427.59	100	Cd	1427.59	100	Cd	12.7	100	Cd
2382.86	0	Cd	2382.86	0	Cd	2382.86	80	Cd	2382.86	80	Cd	2382.86	80	Cd	2382.86	80	Cd	2382.86	100	Cd	2382.86	100	Cd	21.2	100	Cd
2382.86	0	Cd	2382.86	60	Cd	2382.86	100	Cd	2382.86	100	Cd	2382.86	100	Cd	2382.86	100	Cd	2382.86	100	Cd	2382.86	100	Cd	21.2	100	Cd
4986.7	60	Cd	4986.7	100	Cd	4986.7	100	Cd	4986.7	100	Cd	4986.7	100	Cd	4986.7	100	Cd	4986.7	100	Cd	4986.7	100	Cd	44.36	100	Cd
4986.7	100	Cd	4986.7	100	Cd	4986.7	100	Cd	4986.7	100	Cd	4986.7	100	Cd	4986.7	100	Cd	4986.7	100	Cd	4986.7	100	Cd	44.36	100	Cd
7282.5	100	Cd	7282.5	100	Cd	7282.5	100	Cd	7282.5	100	Cd	7282.5	100	Cd	7282.5	100	Cd	7282.5	100	Cd	7282.5	100	Cd	64.79	100	Cd
7282.5	100	Cd	7282.5	100	Cd	7282.5	100	Cd	7282.5	100	Cd	7282.5	100	Cd	7282.5	100	Cd	7282.5	100	Cd	7282.5	100	Cd	64.79	100	Cd
10147.5	100	Cd	10147.5	100	Cd	10147.5	100	Cd	10147.5	100	Cd	10147.5	100	Cd	10147.5	100	Cd	10147.5	100	Cd	10147.5	100	Cd	90.27	100	Cd
10147.5	100	Cd	10147.5	100	Cd	10147.5	100	Cd	10147.5	100	Cd	10147.5	100	Cd	10147.5	100	Cd	10147.5	100	Cd	10147.5	100	Cd	90.27	100	Cd
11920.5	100	Cd	11920.5	100	Cd	11920.5	100	Cd	11920.5	100	Cd	11920.5	100	Cd	11920.5	100	Cd	11920.5	100	Cd	11920.5	100	Cd	106.04	100	Cd
11920.5	100	Cd	11920.5	100	Cd	11920.5	100	Cd	11920.5	100	Cd	11920.5	100	Cd	11920.5	100	Cd	11920.5	100	Cd	11920.5	100	Cd	106.04	100	Cd
651.9	0	Zn	651.9	0	Zn	651.9	0	Zn	651.9	0	Zn	651.9	0	Zn	651.9	0	Zn	651.9	0	Zn	651.9	0	Zn	9.97	0	Zn
651.9	0	Zn	651.9	0	Zn	651.9	0	Zn	651.9	0	Zn	651.9	0	Zn	651.9	0	Zn	651.9	0	Zn	651.9	0	Zn	9.97	0	Zn
1184.4	0	Zn	1184.4	0	Zn	1184.4	0	Zn	1184.4	0	Zn	1184.4	0	Zn	1184.4	0	Zn	1184.4	0	Zn	1184.4	0	Zn	18.11	0	Zn
1184.4	0	Zn	1184.4	0	Zn	1184.4	0	Zn	1184.4	0	Zn	1184.4	20	Zn	1184.4	20	Zn	1184.4	20	Zn	1184.4	20	Zn	18.11	20	Zn
1976.74	20	Zn	1976.74	40	Zn	1976.74	60	Zn	1976.74	60	Zn	1976.74	60	Zn	1976.74	60	Zn	1976.74	60	Zn	1976.74	60	Zn	30.23	60	Zn
1976.74	0	Zn	1976.74	0	Zn	1976.74	20	Zn	1976.74	40	Zn	1976.74	40	Zn	1976.74	80	Zn	1976.74	80	Zn	1976.74	80	Zn	30.23	80	Zn
4084.95	0	Zn	4084.95	40	Zn	4084.95	40	Zn	4084.95	100	Zn	4084.95	100	Zn	4084.95	100	Zn	4084.95	100	Zn	4084.95	100	Zn	62.47	100	Zn
4084.95	0	Zn	4084.95	0	Zn	4084.95	80	Zn	4084.95	100	Zn	4084.95	100	Zn	4084.95	100	Zn	4084.95	100	Zn	4084.95	100	Zn	62.47	100	Zn
5482.69	0	Zn	5482.69	60	Zn	5482.69	80	Zn	5482.69	100	Zn	5482.69	100	Zn	5482.69	100	Zn	5482.69	100	Zn	5482.69	100	Zn	83.85	100	Zn
5482.69	0	Zn	5482.69	0	Zn	5482.69	80	Zn	5482.69	100	Zn	5482.69	100	Zn	5482.69	100	Zn	5482.69	100	Zn	5482.69	100	Zn	83.85	100	Zn
7494	0	Zn	7494	60	Zn	7494	80	Zn	7494	80	Zn	7494	80	Zn	7494	80	Zn	7494	80	Zn	7494	80	Zn	114.6	80	Zn
7494	0	Zn	7494	20	Zn	7494	60	Zn	7494	100	Zn	7494	100	Zn	7494	100	Zn	7494	100	Zn	7494	100	Zn	114.6	100	Zn
8450.25	0	Zn	8450.25	40	Zn	8450.25	40	Zn	8450.25	80	Zn	8450.25	80	Zn	8450.25	80	Zn	8450.25	80	Zn	8450.25	100	Zn	129.23	100	Zn
8450.25	0	Zn	8450.25	0	Zn	8450.25	40	Zn	8450.25	100	Zn	8450.25	100	Zn	8450.25	100	Zn	8450.25	100	Zn	8450.25	100	Zn	129.23	100	Zn
0	0	Control	0	0	Control	0	0	Control	0	0	Control	0	0	Control	0	0	Control	0	0	Control	0	0	Control	0	0	Control
0	0	Control	0	0	Control	0	0	Control	0	0	Control	0	0	Control	0	0	Control	0	0	Control	0	0	Control	0	0	Control
0	0	Control	0	0	Control	0	0	Control	0	0	Control	0	0	Control	0	0	Control	0	0	Control	0	0	Control	0	0	Control
0	0	Control	0	0	Control	0	0	Control	0	0	Control	0	0	Control	0	0	Control	0	0	Control	0	0	Control	0	0	Control
0	0	Control	0	0	Control	0	0	Control	0	0	Control	0	0	Control	0	0	Control	0	0	Control	0	0	Control	0	0	Control
0	0	Control	0	0	Control	0	0	Control	0	0	Control	0	0	Control	0	0	Control	0	0	Control	0	0	Control	0	0	Control
0	0	Control	0	0	Control	0	0	Control	0	0	Control	0	0	Control	0	0	Control	0	0	Control	0	0	Control	0	0	Control
0	0	Control	0	0	Control	0	0	Control	0	0	Control	0	0	Control	0	0	Control	0	0	Control	0	0	Control	0	0	Control
0	0	Control	0	0	Control	0	0	Control	0	0	Control	0	0	Control	0	0	Control	0	0	Control	0	0	Control	0	0	Control
0	0	Control	0	0	Control	0	0	Control	0	0	Control	0	0	Control	0	0	Control	0	0	Control	0	0	Control	0	0	Control
0	0	Control	0	0	Control	0	0	Control	0	0	Control	0	0	Control	0	0	Control	0	0	Control	0	0	Control	0	0	Control
0	0	Control	0	0	Control	0	0	Control	0	0	Control	0	0	Control	0	0	Control	0	0	Control	0	0	Control	0	0	Control
0	0	Control	0	0	Control	0	0	Control	0	0	Control	0	0	Control	0	0	Control	0	0	Control	0	0	Control	0	0	Control
0	0	Control	0	0	Control	0	0	Control	0	0	Control	0	0	Control	0	0	Control	0	0	Control	0	0	Control	0	0	Control
0	0	Control	0	0	Control	0	0	Control	0	0	Control	0	0	Control	0	0	Control	0	0	Control	0	0	Control	0	0	Control
0	0	Control	0	0	Control	0	0	Control	0	0	Control	0	0	Control	0	0	Control	0	0	Control	0	0	Control	0	0	Control
0	0	Control	0	0	Control	0	0	Control	0	0	Control	0	0	Control	0	0	Control	0	0	Control	0	0	Control	0	0	Control
0	0	Control	0	0	Control	0	0	Control	0	0	Control	0	0	Control	0	0	Control	0	0	Control	0	0	Control	0	0	Control
0	0	Control	0	0	Control	0	0	Control	0	0	Control	0	0	Control	0	0	Control	0	0	Control	0	0	Control	0	0	Control
0	0	Control	0	0	Control	0	0	Control	0	0	Control	0	0	Control	0	0	Control	0	0	Control	0	0	Control	0	0	Control

## Sheet: MetalsinCarcasses
Toxicity and bioaccumulation of Cadmium, Copper and Zinc in a direct comparison at equitoxic concentrations in common carp (Cyprinus carpio) juveniles
Vyshal Delahaut, Božidar Rašković, Marta Satorres Salvado, Lieven Bervoets, Ronny Blust, Gudrun De Boeck
Sample.ID	Element	Conc...µM.	µM	Exposure	Duration.of.exposure..hrs.	Status	CuAcumm_µgpergDW	ZnAcumm_µgpergDW	CdAcumm_µgpergDW	KAcumm_µgpergDW	MgAcumm_µgpergDW	NAcumm_µgpergDW	CaAcumm_µgpergDW
186	Cd	100	µM	100_µM	9	Victim	5.17015	490.64	96.0982	13240.5	1249.75	2470.32	31689.6
187	Cd	100	µM	100_µM	6	Victim	3.89762	513.964	86.0048	15023.8	1362.62	3454.76	30385.7
188	Cd	100	µM	100_µM	6	Victim	4.4955	510.296	82.2284	14145.3	1357.23	3230.45	30693.4
189	Cd	100	µM	100_µM	9	Victim	4.95389	507.543	81.127	13974.5	1304.67	3033.66	26953.3
190	Cd	100	µM	100_µM	6	Victim	5.75887	544.003	68.1617	15225.5	1549.79	3512.06	35472.3
191	Cd	100	µM	100_µM	6	Victim	5.23353	512.623	87.7222	14012	1273.53	2900.6	26342.5
192	Cd	100	µM	100_µM	6	Victim	4.31733	543.381	101.949	15146.7	1486.13	3360	31184
193	Cd	100	µM	100_µM	6	Victim	5.56364	470.768	106.261	14903	1461.01	3012.12	30897
194	Cd	100	µM	100_µM	6	Victim	6.35341	532.795	117.555	15519.7	1466.35	3261.04	30342.2
195	Cd	100	µM	100_µM	6	Victim	5.79329	638.872	78.6013	15385.2	1481.88	3124.83	35855
196	Cd	80	µM	80_µM	6	Victim	6.28204	552.869	55.9614	14702.4	1361.29	3131.37	28452.5
197	Cd	80	µM	80_µM	6	Victim	5.18095	563.932	39.7654	15677.2	1449.42	3775.44	35536.8
198	Cd	80	µM	80_µM	9	Victim	4.70361	519.586	49.3221	13863.5	1260.88	3093.98	30901.2
199	Cd	80	µM	80_µM	9	Victim	5.87755	428.21	43.4245	13904.8	1252.11	3110.2	26400
200	Cd	80	µM	80_µM	9	Victim	4.65442	497.649	61.2674	15425.7	1413.02	3138.56	30258.4
201	Cd	80	µM	80_µM	9	Victim	4.53984	443.351	62.1882	13463.4	1215.33	2657.38	21814.6
202	Cd	80	µM	80_µM	9	Victim	4.80974	372.709	86.1455	13369.9	1351.6	2513.24	39072.1
203	Cd	80	µM	80_µM	6	Victim	6.84394	473.433	113.005	15229.3	1451.27	2970.14	30895.8
204	Cd	80	µM	80_µM	6	Victim	5.61781	538.416	72.6737	14458.3	1322.11	2932.79	25564.4
205	Cd	80	µM	80_µM	9	Victim	4.25664	474.568	85.0266	15137.8	1425.16	2953.38	29341.4
206	Cd	60	µM	60_µM	9	Victim	5.22395	567.696	65.1377	15262.3	1488.38	3015.57	31142.5
207	Cd	60	µM	60_µM	12	Victim	4.39452	575.337	77.1753	15263	1461.37	3049.32	33879.5
208	Cd	60	µM	60_µM	6	Victim	5.35897	606.149	61.5103	14769.2	1397.69	3182.05	32600
209	Cd	60	µM	60_µM	15	Victim	5.81828	537.244	64.8546	13796.7	1350.84	2549.29	32852.5
210	Cd	60	µM	60_µM	9	Victim	5.10067	481.117	66.8385	14396.4	1347.11	2913.65	27296.6
211	Cd	60	µM	60_µM	15	Victim	5.01322	510.207	76.4331	14130.6	1352.56	2869.42	38608.3
212	Cd	60	µM	60_µM	9	Victim	5.02263	492.612	75.9682	14461.2	1429.97	2815.9	33086.2
213	Cd	60	µM	60_µM	9	Victim	5.86269	526.157	67.5657	14214.9	1324.78	2943.28	33635.8
214	Cd	60	µM	60_µM	9	Victim	3.7803	403.854	50.0518			1711.92	19814.2
215	Cd	60	µM	60_µM		Victim	4.08092	364.555	76.8625	13861.1	1338.85	2672.18	36160
216	Cd	40	µM	40_µM	24	Victim	5.16897	540.803	45.0499	14190.4	1422.05	2722.01	27924.5
217	Cd	40	µM	40_µM	24	Victim	3.98635	519.313	25.0439	15000.4	1473.26	4069.94	37878
218	Cd	40	µM	40_µM	27	Victim	4.50619	489.221	41.292	14460.2	1596.11	3293.1	47532.7
219	Cd	40	µM	40_µM	27	Victim	4.7	482.424	21.3289	14700	1457.56	4326.67	33480
220	Cd	40	µM	40_µM	24	Victim	4.8	481.207	36.346	14163.4	1342.11	3077.26	27690.9
221	Cd	40	µM	40_µM	27	Victim	5.93282	519.51	57.0253	15218.6	1492.51	3063.57	41203.1
222	Cd	40	µM	40_µM	15	Victim	4.58836	393.568	56.3365	14378.8	1371.43	2685.71	28711.1
223	Cd	40	µM	40_µM	15	Victim	4.91327	564.828	57.2437	15039.5	1491.45	2905.01	37083.2
224	Cd	40	µM	40_µM	24	Victim	4.40083	527.596	25.8545	14132.2	1279	3637.42	30057.4
225	Cd	40	µM	40_µM	15	Victim	5.01106	452.157	40.1021	14954.9	1414.3	3443.4	27319.1
226	Cd	20	µM	20_µM	63	Victim	5.30104	719.992	37.6997	15227.7		5721.8	35111.4
227	Cd	20	µM	20_µM	51	Victim	5.53828	576.885	37.4148	14369.1	1540.89	5308.01	29398.2
228	Cd	20	µM	20_µM	54	Victim	3.40068	452.437	18.3078	12946.4	1319.05	5928.14	31305.8
229	Cd	20	µM	20_µM	63	Victim	4.36667	524.536	30.3444	14846.7	1651.56	5942.22	31520
230	Cd	20	µM	20_µM	189	Victim	0.510835	96.4902	10.3737			960.568	6053.29
231	Cd	20	µM	20_µM	27	Victim	6.58978	630.879	22.7485	13940.3	1539.8	5323.52
232	Cd	20	µM	20_µM	51	Victim	5.44183	581.373	11.7822	14922.6	1409.05	5313.47	27369.6
233	Cd	20	µM	20_µM	54	Victim	3.83142	576.383	17.5816	13980.1	1432.64	5459	28983.9
234	Cd	20	µM	20_µM	27	Victim	5.37666	535.881	11.6027	14356.1	1326.32	5081.92	32216
235	Cd	20	µM	20_µM	33	Victim	5.95405	516.39	14.2162	14421.1	1363.92	5140.49	25835
236	Cd	15	µM	15_µM	51	Victim	4.33424	461.408	14.8812	12294	1217.02	4608.12	17993
237	Cd	15	µM	15_µM	141	Victim	3.73333	646.125	74.1657	14032.3		7600	37890.9
238	Cd	15	µM	15_µM	69	Victim	4.53483	437.422	6.32434	13880.1	1337.08	5048.69	8732.58
239	Cd	15	µM	15_µM	45	Victim	4.78968	385.615	6.76111	13603.2	1254.76	4759.52	17171.4
240	Cd	15	µM	15_µM	99	Victim	4.64489	438.328	15.3209	10927.6	1321.53	4459.24	24066
241	Cd	15	µM	15_µM	51	Victim	3.78065	608.116	14.9355	15538.7	1447.1	5435.48	27503.2
242	Cd	15	µM	15_µM	120	Victim	5.63817	614.314	27.7614	9913.32	1551.01	8970.18	36147.9
243	Cd	15	µM	15_µM	42	Victim	3.98885	369.302	4.32788	10713.8		4024.54	8997.77
244	Cd	15	µM	15_µM	81	Victim	4.83837	455.251	17.9098	12332.5	1350.2	4143.52	26523.6
245	Cd	15	µM	15_µM	78	Victim	4.21836	549.318	44.1052	12704.7	1407.64	5770.72	25739
246	Cd	10	µM	10_µM	78	Victim	5.73951	534.465	15.5461	11731.6	1504.99	5124.94	36715.2
247	Cd	10	µM	10_µM	45	Victim	4.49552	497.779	8.91741	14179.1	1321.99	4863.68	25683.6
248	Cd	10	µM	10_µM	90	Victim	4.81924	530.862	29.8337	11290.7	1388.59	4332.65	33253.6
249	Cd	10	µM	10_µM	51	Victim	3.89931	488.295	8.38261	12395.4	1117.07	4296.57	21407.8
250	Cd	10	µM	10_µM	51	Victim	6.01449	463.953	4.75521	13427	1110.87	4418.88	16186.2
251	Cd	10	µM	10_µM	48	Victim	4.30232	451.517	7.92442	12708.7	1273.58	4620.32	24179.7
252	Cd	10	µM	10_µM	75	Victim	3.36147	362.917	11.7346		1050.89	2989.6	18333.9
253	Cd	10	µM	10_µM	96	Victim	7.69328	761.252	25.8498			9160.47	40856.9
254	Cd	10	µM	10_µM	81	Victim	2.90247	280.059	7.98025			2458.02	14703.7
255	Cd	10	µM	10_µM	84	Victim	7.93684	685.513	18.2494			5841.3	38448.6
256	Cd	5	µM	5_µM	51	Victim	5.11186	487.129	6.65763	14249.3	1386.82	5706.97	26666.7
257	Cd	5	µM	5_µM	51	Victim	5.67171	412.008	6.6008	12447.8	1179.12	5064.54	21925.1
258	Cd	5	µM	5_µM	75	Victim	5.1371	457.716	9.83573	14155.7	1493.74	5203.05	26169.2
259	Cd	5	µM	5_µM	84	Victim	5.02818	490.468	7.64735	12139.8	1241.94	4868.55	20807.2
260	Cd	5	µM	5_µM	240	Survivor	4.49293	720.743	32.1737			9191.92	48460.6
261	Cd	5	µM	5_µM	84	Victim	3.44136	532.518	19.3285	9829.68	1414.31	4469.1	28951.8
262	Cd	5	µM	5_µM	45	Victim	5.87524	654.552	4.49132		1714.98	7302.89	33831.5
263	Cd	5	µM	5_µM	45	Victim	4.07236	471.259	12.138	11724	1103.79	4676.72	21041.2
264	Cd	5	µM	5_µM	54	Victim	9.2113	852.806	9.36459			9017.35	34564.7
265	Cd	5	µM	5_µM	66	Victim	5.27614	487.42	9.57494	12350.8	1319.9	3974.94	21848.7
266	Cd	2.5	µM	2.5_µM	81	Victim	5.10955	465.361	5.07203	12144.7	1417.76	4733	30022.1
267	Cd	2.5	µM	2.5_µM	48	Victim	4.69213	538.456	2.95056	14330.3	1326.07	5606.74	24431.5
268	Cd	2.5	µM	2.5_µM	120	Victim	2.9479	589.835	10.0773	12104.2	1769.41	6800	34729.4
269	Cd	2.5	µM	2.5_µM	54	Victim	4.78104	457.022	2.38989	13143.8	1160.06	5137.44	22301.4
270	Cd	2.5	µM	2.5_µM	60	Victim	4.96301	486.796	2.87752	12704.3	1188.93	4632.56	17286.4
271	Cd	2.5	µM	2.5_µM	60	Victim	4.79223	455.816	4.10485	11528.2	1183.88	4937.86	20341.7
272	Cd	2.5	µM	2.5_µM	42	Victim	6.13655	463.67	2.78897	13285.5	1178.62	5038.62	17784.8
273	Cd	2.5	µM	2.5_µM	96	Victim	5.06615	491.057	5.93692	12436.9	1487.23	4740	25809.2
274	Cd	2.5	µM	2.5_µM	81	Victim	5.50662	556.81	5.96655	10613.2	1538.68	6485.02	28825.1
275	Cd	2.5	µM	2.5_µM	96	Victim	5.49897	562.526	6.71753	13154.6	1620.82	5690.72	31397.9
276	Cd	1	µM	1_µM	60	Victim	4.54026	500.799	2.05368	13852.8	1275.61	5418.76	21596.5
277	Cd	1	µM	1_µM	81	Victim	5.54976	481.283	2.16618	14691.8	1421.84	4941.06	22643.5
278	Cd	1	µM	1_µM	66	Victim	9.80317	1024.93	5.62032			9457.78	50407.6
279	Cd	1	µM	1_µM	60	Victim	6.06494	784.062	3.36623			8044.16	47064.9
280	Cd	1	µM	1_µM	60	Victim	4.25572	522.924	2.09244	14256.6	1506.87	4879.48	36295.5
281	Cd	1	µM	1_µM	108	Victim	4.94568	548.316	5.24444	13377.8	1360.99	5491.36	28474.1
282	Cd	1	µM	1_µM	237	Victim	4.82	805.685	14.765	10425		8710	51450
283	Cd	1	µM	1_µM	69	Victim	5.11124	466.092	1.70787	12528.1	1203.37	5492.13	17507.9
284	Cd	1	µM	1_µM	66	Victim	5.79636	546.761	2.48145	13447.3	1426.91	6203.64	20386.9
285	Cd	1	µM	1_µM	96	Victim	3.60816	631.669	4.24082	12526.5	1606.94	5910.2	40775.5
286	Cd	0.5	µM	0.5_µM	114	Victim	4.98928	456.708	3.00924	14405.9	1303.51	5251.02	23148.2
287	Cd	0.5	µM	0.5_µM	102	Victim	3.45366	561.646	2.27317	13148.8	1499.76	5939.02	25536.6
288	Cd	0.5	µM	0.5_µM	66	Victim	5.8437	470.436	2.68325	13422.6	1324.4	6092.5	21014.4
289	Cd	0.5	µM	0.5_µM	141	Victim	2.74954	634.272	4.98708	11923.7	1665.48	6094.77	34958.8
290	Cd	0.5	µM	0.5_µM	60	Victim	4.84376	457.112	1.96761	11651.6	1160.79	5244.64	17498.5
291	Cd	0.5	µM	0.5_µM	120	Victim	3.87669	560.802	3.64812	13616.5	1373.68	5431.58	29648.1
292	Cd	0.5	µM	0.5_µM	138	Victim	5.34175	801.636	4.42667	11146.7		8002.81	45726.3
293	Cd	0.5	µM	0.5_µM	60	Victim	5.18926	467.576	1.33244	13906	1253.69	4735.57	19774.5
294	Cd	0.5	µM	0.5_µM	114	Victim	6.64078	539.441	2.59159		1433.53	5426.54	32279.6
295	Cd	0.5	µM	0.5_µM	114	Victim	3.87438	488.139	3.3157	13608.3	1410.08	4585.12	24882.6
296	Cd	0.1	µM	0.1_µM	90	Victim	5.29483	491.619	2.93367	12538.2	1332.91	4345.29	26026
297	Cd	0.1	µM	0.1_µM	111	Victim	4.64386	572.962	2.00096	10326.7	1443.86	5166.27	27388.9
298	Cd	0.1	µM	0.1_µM	72	Victim	4.68931	493.469	1.80629	13886.8	1323.27	5964.78	21856.6
299	Cd	0.1	µM	0.1_µM	75	Victim	4.98366	448.861	1.90648	11932.4	1126.76	4234.37	16347
300	Cd	0.1	µM	0.1_µM	40	Victim	5.75956	550.417	1.32568	14841.5	1259.02	5593.44	19842.6
301	Cd	0.1	µM	0.1_µM	102	Victim	4.75728	456.988	1.83042	13540.5	1449.84	4960.52	22757.3
302	Cd	0.1	µM	0.1_µM	93	Victim	4.82409	562.772	2.30366	13921.7	1631.31	6590.97	26642.6
303	Cd	0.1	µM	0.1_µM	40	Victim	5.54916	497.99	1.54467	14892	1316.79	5896.07	20330.5
304	Cd	0.1	µM	0.1_µM	75	Victim	5.9386	579.068	2.27004	12888.2	1461.7	4999.11	22469.2
305	Cd	0.1	µM	0.1_µM	120	Victim	4.73138	628.092	3.10293	11968.2	1502.09	5430.96	26942.3
306	Cd	0.05	µM	0.05_µM	240	Survivor	5.41441	535.688	3.58732	16115.3	1417.87	6102.59	28606.3
307	Cd	0.05	µM	0.05_µM	240	Survivor	5.13045	498.566	2.22381	14963.1	1226.55	5503.9	16266.4
308	Cd	0.05	µM	0.05_µM	240	Survivor	5.30036	519.904	4.31127	15476.4	1380.07	5991.27	26967.3
309	Cd	0.05	µM	0.05_µM	240	Survivor	4.82717	499.771	2.96522	15347.8	1357.61	6071.74	22134.8
310	Cd	0.05	µM	0.05_µM	240	Survivor	5.61333	507.375	3.57524	15169.5	1421.33	6382.86	23977.1
311	Cd	0.05	µM	0.05_µM	240	Survivor	5.51111	505.97	0.753535	14134.7	1252.53	5065.99
312	Cd	0.05	µM	0.05_µM	240	Survivor	4.87311	390.653	2.46162	14412.5	1156.14	5319.06	17526.9
313	Cd	0.05	µM	0.05_µM	240	Survivor	8.8172	879.613	5.17149			9291.88	43593.5
314	Cd	0.05	µM	0.05_µM	240	Survivor	5.58058	644.61	3	16885.4	1473.98	6984.47	29161.2
315	Cd	0.05	µM	0.05_µM	240	Survivor	5.59166	471.499	2.06635	14703.3	1305.02	5815.36	10123.2
171	C	0	µM	0_µM	240	Survivor	5.72677	481.127	0.226462	15532.3	1405.54	6296.62	33289.8
172	C	0	µM	0_µM	240	Survivor	5.54607	469.659	0.226003	14253.6	1347.03	5607.7	43084.4
173	C	0	µM	0_µM	240	Survivor	5.19224	622.298		14942.9	1500.94	6628.25
174	C	0	µM	0_µM	240	Survivor	4.98429	515.716	0.237143	14614.3	1311.29	5524.29	31037.1
175	C	0	µM	0_µM	240	Survivor	5.24922	564.962	0.255113	15084.9	1338.79	6002.08	44630.8
176	C	0	µM	0_µM	240	Survivor	5.33207	608.234	0.219905	16341.2	1426.86	6944.71	45846.4
177	C	0	µM	0_µM	240	Survivor	4.31608	597.105		16232.2	1529.79	7608.39	44106.3
178	C	0	µM	0_µM	240	Survivor	4.87714	561.843		15305.7	1493.14	7048.57	52765.7
179	C	0	µM	0_µM	240	Survivor	3.64277	823.98		17061.6		9589.94
180	C	0	µM	0_µM	240	Survivor	5.94828	681.128		17237.9	1699.66	8100	52572.4
181	C	0	µM	0_µM	240	Survivor	4.29854	544.914		15498.5	1500.41	6574.93	48573.8
182	C	0	µM	0_µM	240	Survivor	5.23314	564.896	0.338462	14946.7	1315.98	5718.34	37569.2
183	C	0	µM	0_µM	240	Survivor	3.15536	449.432		14911.6	1534.08	7478.11	52800
184	C	0	µM	0_µM	240	Survivor	4.56286	451.424	0.333901	12954	1206.81	5154.34	32005.5
185	C	0	µM	0_µM	240	Survivor	5.09559	601.728	0.314706	15455.9	1425.15	5870.59	43888.2
316	C	0	µM	0_µM	240	Survivor	6.59104	603.026	0.41791	17330.1	1678.09	6230.45	41466.3
318	C	0	µM	0_µM	240	Survivor	5.10776	458.087	0.314856	14820.4	1266.52	5011.97	21717.1
319	C	0	µM	0_µM	240	Survivor	5.18073	497.762	0.330511	14645.3	1265.99	4884.09	25653.7
320	C	0	µM	0_µM	240	Survivor	4.22154	458.552	0.247326	14019	1189.16	4812.31
1	Cu	11	µM	11_µM	9	Victim	19.7305	409.035	0.329412	12889.8	1146.24	2844.92	21784
2	Cu	11	µM	11_µM	9	Victim	13.4503	522.257	0.299494	13397.6	1306.85	2792.58	30945
3	Cu	11	µM	11_µM	9	Victim	26.2131	515.531	0.356204	13475.4	1404.96	3050.12	39275.9
4	Cu	11	µM	11_µM	9	Victim	20.0354	477.884	0.221769	14408.2	1298.64	3084.35	27485.7
5	Cu	11	µM	11_µM	9	Victim	17.3705	514.805	0.194422	14068.5	1352.35	2892.43	34192.8
6	Cu	11	µM	11_µM	9	Victim	18.9467	542.769	0.251187	14917.2	1410.87	2858.05	29559.9
7	Cu	11	µM	11_µM	9	Victim	12.5284	473.927	0.211092	13399.7	1225.28	2507.56	30252.1
8	Cu	11	µM	11_µM	9	Victim	16.1739	542.01	0.188795	14084.9	1407.13	3129.37	26477.4
9	Cu	11	µM	11_µM	9	Victim	17.0427	496.635	0.241463	13256.1	1291.46	2834.15	32407.3
10	Cu	11	µM	11_µM	9	Victim	12.8611	926.485		15847.3		4360.31
11	Cu	8.8	µM	8.8_µM	9	Victim	16.4733	474.793	0.156806	14392.7	1349.4	2951.72	33164.4
12	Cu	8.8	µM	8.8_µM	9	Victim	17.2461	500.825	0.160674	14584.3	1388.76	2898.88	27074.2
13	Cu	8.8	µM	8.8_µM	12	Victim	14.6602	440.974	0.19698	12562.1	1136.35	2757.72	17432.8
14	Cu	8.8	µM	8.8_µM	9	Victim	11.6842	591.85		14842.1	1500.15	2885.41	30586.5
15	Cu	8.8	µM	8.8_µM	9	Victim	11.2771	513.77		14362.5	1446.39	2968.6	35424.8
16	Cu	8.8	µM	8.8_µM	15	Victim	14.0681	436.16		14829.6	1488.3	3016.3	36551.1
17	Cu	8.8	µM	8.8_µM	9	Victim	12.4986	570.103		13817.2	1353.13	2872.02	32217.2
18	Cu	8.8	µM	8.8_µM	9	Victim	16.7352	523.755	0.236694	13110.7	1194.18	2787.44	32774.9
19	Cu	8.8	µM	8.8_µM	9	Victim	17.423	504.955		14090.2	1412.09	3138.72	34437.4
20	Cu	8.8	µM	8.8_µM	12	Victim	17.7483	415.438	0.185103	14326.5	1343.9	3161.97	27141.7
21	Cu	6.6	µM	6.6_µM	12	Victim	16.2717	637.773		14344.4	1501.6		31572.2
22	Cu	6.6	µM	6.6_µM	9	Victim	14.5595	468.447	0.206186	11846	1152.03	2655.67	31736.1
23	Cu	6.6	µM	6.6_µM	9	Victim	11.515	598.525		15501	1557.35	3724.04	35807.7
24	Cu	6.6	µM	6.6_µM	9	Victim	14.7333	708.489		16003.2	1574.6	3593.65	32247.6
25	Cu	6.6	µM	6.6_µM	9	Victim	13.9388	634.635		16152.9	1643.29	3595.29	46235.3
26	Cu	6.6	µM	6.6_µM	12	Victim	15.2831	485.155	0.244399	13399.6	1325.13	2958.86	35848.5
27	Cu	6.6	µM	6.6_µM	15	Victim	12.8835	439.59	0.195683	12483.5	1242.3	2735.25	31346.8
28	Cu	6.6	µM	6.6_µM	9	Victim	11.7974	616.591		15102.9	1515.57	2853.83	36031.7
29	Cu	6.6	µM	6.6_µM	9	Victim	15.7441	468.704	0.272669	14739.5	1372.35	3287.46	25227
31	Cu	4.4	µM	4.4_µM	15	Victim	15.4078	527.874	0.195641	14480.1	1406.75	3083.68	33594.4
32	Cu	4.4	µM	4.4_µM	15	Victim	13.3163	541.357		15374.9	1505.71	3328	31820.8
33	Cu	4.4	µM	4.4_µM	15	Victim	10.104	475.159		14664.2	1500.14	3348.01	35466
34	Cu	4.4	µM	4.4_µM	15	Victim	10.3073	693.873		15970.7	1594.63	3404.88	38239
35	Cu	4.4	µM	4.4_µM	15	Victim	7.65887	586.741		14523.8	1418.26	3559.25	32404.5
36	Cu	4.4	µM	4.4_µM	15	Victim	12.7304	508.35	0.192547	13354	1272.05	2775.16	22017.4
37	Cu	4.4	µM	4.4_µM	15	Victim	8.53069	534.392		14785.5	1444.22	3160.4	37085.2
38	Cu	4.4	µM	4.4_µM	15	Victim	7.54783	660.226		14987		3570.43
39	Cu	4.4	µM	4.4_µM	18	Victim	13.7233	510.807	0.18748	14677.4	1502.41	3006.1	32529
40	Cu	4.4	µM	4.4_µM	15	Victim	8.59667	530.903		15553.3	1659.33	3195.33	45780
41	Cu	2.2	µM	2.2_µM	18	Victim	6.04324	727.351		15466.7	1695.14	3945.95	46616.2
42	Cu	2.2	µM	2.2_µM	21	Victim	7.82266	534.705		13552.7	1360.2	2910.34	28670
43	Cu	2.2	µM	2.2_µM	21	Victim	6.70308	565.558		14178	1394.89	3517.18	31707.5
44	Cu	2.2	µM	2.2_µM	21	Victim	7.97652	484.739		13166.6	1259.23	3284.88	27369.8
45	Cu	2.2	µM	2.2_µM	21	Victim	5.58441	500.154		13294.3	1355.01	3117.35	34208.2
46	Cu	2.2	µM	2.2_µM	21	Victim	5.91158	516.554		13349.5	1346.74	3492.63	29873.7
47	Cu	2.2	µM	2.2_µM	21	Victim	6.05984	586.822		14097.6	1434.96	3779.53	34859.8
48	Cu	2.2	µM	2.2_µM	21	Victim	8.09543	540.994	0.200398	13907	1379.09	3297.02	26901
49	Cu	2.2	µM	2.2_µM	21	Victim	5.63239	629.072		15148.2	1562.75	3387.85	45978.9
50	Cu	2.2	µM	2.2_µM	21	Victim	5.15789	423.596		10265.3	1098.81	2618.95	29920
51	Cu	1	µM	1_µM	18	Victim	5.8875	462.14		12977.1	1309.58	3231.25	28187.5
52	Cu	1	µM	1_µM	18	Victim	5.99755	444.012	0.148012	12176.1	1185.81	3308.87	22598.2
53	Cu	1	µM	1_µM	24	Victim	5.90027	449.358		11251.5	1236.25	3245.04	28491.2
54	Cu	1	µM	1_µM	36	Victim	6.23327	326.808	0.156788	10401.5	1024.09	2694.46
55	Cu	1	µM	1_µM	39	Victim	7.2823	528.863		14218.9	1541.73	4072.43	37649.4
56	Cu	1	µM	1_µM	9	Victim	7.25581	468.784		13414	1379.67	4101	28401.3
57	Cu	1	µM	1_µM	24	Victim	7.50031	544.062		13457.2	1433.35	3200	30055.4
58	Cu	1	µM	1_µM	21	Victim	6.03333	445.903		12460.6	1331.52	3760.61	34600
59	Cu	1	µM	1_µM	9	Victim	6.52648	513.959		13764.4	1434.94	4148.62	30270.4
60	Cu	1	µM	1_µM	18	Victim	7.01597	623.251		13247.3	1503.64	3560.38	38584
61	Cu	0.8	µM	0.8_µM	21	Victim	7.12479	428.759		11177.8	1207.18	3673.5	36943.6
62	Cu	0.8	µM	0.8_µM	3	Victim	3.44408	224.619				2153.13
63	Cu	0.8	µM	0.8_µM	240	Survivor	15.567	622.165		12616.5	1542.75	3915.6	49739.4
64	Cu	0.8	µM	0.8_µM	240	Survivor	16.458	951.969		14161.8		4318.17
65	Cu	0.8	µM	0.8_µM	39	Victim	7.2467	498.609		13340.1	1380.3	3597.97	39374.6
66	Cu	0.8	µM	0.8_µM	15	Victim	7.24436	542.685	0.220394	12302	1281	3699.46	34312.7
67	Cu	0.8	µM	0.8_µM	36	Victim	5.90798	453.065		11744.5	1298.07	3171.92	39821.2
68	Cu	0.8	µM	0.8_µM	21	Victim	6.42478	514.687		12578.8	1253.63	3274.34	29139.8
69	Cu	0.8	µM	0.8_µM	15	Victim	7.1157	571.418		12452.5	1402.49	3179.35	31040
70	Cu	0.8	µM	0.8_µM	9	Victim	7.68922	540.742		13531.8	1424.96	3370.43	29016.5
71	Cu	0.6	µM	0.6_µM	216	Victim	12.4775	419.423		11094.9	1322.76	3167.93	36561.2
72	Cu	0.6	µM	0.6_µM	45	Victim	7.92308	409.855		12092.3	1231.61	3660.14	23622.4
73	Cu	0.6	µM	0.6_µM	216	Victim	13.7596	478.07		12746.1	1477.95	4000	37365
74	Cu	0.6	µM	0.6_µM	36	Victim	5.66229	482.962		10888.5	1157.5	3259.85	25604.9
75	Cu	0.6	µM	0.6_µM	42	Victim	7.82031	516.229		11529.8	1275.08	3244.31	34205.5
76	Cu	0.6	µM	0.6_µM	39	Victim	5.5391	579.136		13923.9	1492.87	3969.55	33467.1
77	Cu	0.6	µM	0.6_µM	15	Victim	6.40953	449.179		11988.1	1243.77	3227.01	26006.8
78	Cu	0.6	µM	0.6_µM	75	Victim	15.3011	557.581	0.200421	14720	1422.65	3038.32	37470.3
79	Cu	0.6	µM	0.6_µM	240	Survivor	13.9129	635.628		11901	1495.84	3393.27	46788.1
80	Cu	0.6	µM	0.6_µM	240	Survivor	13.0435	638.306		13431.4	1595.18		50295.7
81	Cu	0.4	µM	0.4_µM	240	Survivor	11.4888	483.75			1127.56		22276
82	Cu	0.4	µM	0.4_µM	240	Survivor	10.7767	552.202		10953.5	1278.14	3209.3	33446.5
83	Cu	0.4	µM	0.4_µM	240	Survivor	14.8629	592.023		13713.2	1626.92	4259.12	32362.3
84	Cu	0.4	µM	0.4_µM	240	Survivor	10.6708	530.822		11803.6	1367.65	3276.49	36390.7
85	Cu	0.4	µM	0.4_µM	240	Survivor	13.0207	523.154		12026.6	1339.09	3732.78	31160.2
86	Cu	0.4	µM	0.4_µM	240	Survivor	15.0988	668.155		12547	1491.86	4319.37	47544.7
87	Cu	0.4	µM	0.4_µM	240	Survivor	13.0409	551.912		11648.4	1297.76	3352.97	39412.8
88	Cu	0.4	µM	0.4_µM	240	Survivor	11.653	640.08		12840.1	1598.85	4346.95	52817.2
89	Cu	0.4	µM	0.4_µM	240	Survivor	15.4629	758.464		14824.4	1720.19	4803.76	42501.4
90	Cu	0.4	µM	0.4_µM	240	Survivor	11.7207	487.342		10497.3	1240.36	3088.29	29913.5
91	Cu	0.2	µM	0.2_µM	240	Survivor	9.58404	569.682		13101.2	1472.52	4295.26	48143.6
92	Cu	0.2	µM	0.2_µM	240	Survivor	10.5657	528.454		12507.8	1313.85	3796.88	34786.6
93	Cu	0.2	µM	0.2_µM	240	Survivor	11.0334	511.198	0.182493	12042.4	1210.61	3710.34	23458.9
94	Cu	0.2	µM	0.2_µM	240	Survivor	11.0641	600.715		13720.5	1503.78	4493.15	50538.1
95	Cu	0.2	µM	0.2_µM	240	Survivor	18.277	848.411	0.454179				19163.4
96	Cu	0.2	µM	0.2_µM	240	Survivor	10.3125	626.06		13560	1403.25	4132.5	34800
97	Cu	0.2	µM	0.2_µM	240	Survivor	10.3099	573.988		13651.5	1378.94	4191.26	37440
98	Cu	0.2	µM	0.2_µM	240	Survivor	10.0546	512.755	0.207509	11494.9	1131.47	3462.12	25916.7
99	Cu	0.2	µM	0.2_µM	240	Survivor	10.5014	638.794		14056.3	1543.94	4549.3	49639.4
100	Cu	0.2	µM	0.2_µM	240	Survivor	11.325	622.56		13710	1452.25	4262.5	40995
101	Zn	150	µM	150_µM	39	Victim	5.85263	694.189	0.252632	17250.5	1735.16	6418.95	46408.4
102	Zn	150	µM	150_µM	39	Victim	4.94383	485.887	0.215223	12105	1268.24	4151.18	33675.6
103	Zn	150	µM	150_µM	213	Victim	8.06486			11221.6
104	Zn	150	µM	150_µM	102	Victim	2.88148	665.226		11351.9	1491.11	5822.22	42777.8
105	Zn	150	µM	150_µM	90	Victim	3.06643	532.047			1014.36	3759.66	29706.5
106	Zn	150	µM	150_µM	57	Victim	5.00927	515.323	0.240359	12711.5	1295.07	5201.79	28211.7
107	Zn	150	µM	150_µM	81	Victim	4.48044	593.803		12647.9	1365.07	4383.47	26499.2
108	Zn	150	µM	150_µM	66	Victim	5.52017	579.368	0.267775	14330.1	1517.67	5595.01	36543.9
109	Zn	150	µM	150_µM	114	Victim	5.71676	804.867		12380.5	1544.43	5982.7	40955.7
110	Zn	150	µM	150_µM	99	Victim	3.05158	682.737		12068.8	1485.61	5799.1	41549.3
111	Zn	120	µM	120_µM	18	Victim	5.66068	485.59	0.282635	13087.4	1422.28	4744.11	36292.2
112	Zn	120	µM	120_µM	51	Victim	5.1	594.329	0.241667	13004.2	1425.42	4731.25	30437.5
113	Zn	120	µM	120_µM	33	Victim	4.73898	600.669		12266.7	1273.22	4293.79	33057.6
114	Zn	120	µM	120_µM	33	Victim	5.5221	518.562	0.272659	14441.9	1458.58	5261.42	41267.4
115	Zn	120	µM	120_µM	240	Survivor	8.07928			12800
116	Zn	120	µM	120_µM	42	Victim	5.28123	647.657		15439.1	1594.79	6678.93	47650.6
117	Zn	120	µM	120_µM	51	Victim	5.1616	473.836	0.221867	12597.3	1269.33	4469.33	23846.4
118	Zn	120	µM	120_µM	93	Victim	5.81703	902.473		14218.3	1705.99	6124.92	43351.4
119	Zn	120	µM	120_µM	63	Victim	4.67278	509.412		12944.5	1367.33	5302.43	29822.1
120	Zn	120	µM	120_µM	90	Victim	4.89825	806.698		14459.6	1752.63	6431.58	40252.6
121	Zn	90	µM	90_µM	33	Victim	5.90891	622.996	0.619802	13910.9	1305.94	5241.58	34384.2
122	Zn	90	µM	90_µM	120	Victim	4.95046	883.695	0.79633		1345.69	5614.68	42715.6
123	Zn	90	µM	90_µM	36	Victim	8.07626	562.06	0.404853	13892.5	1295.67	5082.84	29773.3
124	Zn	90	µM	90_µM	63	Victim	4.81724	597.528	0.34614	14298	1472.17	5861.4	38313.8
125	Zn	90	µM	90_µM	39	Victim	5.00055	461.309	0.383471	15352.1	1524.85	5406.06	44733.9
126	Zn	90	µM	90_µM	63	Victim	5.90786	689.75	0.364228	14107.3	1450.84	4659.08	34887.8
127	Zn	90	µM	90_µM	60	Victim	5.9702	507.288	0.317908	13563.4	1379.35	4652.55	37653.3
128	Zn	90	µM	90_µM	72	Victim	5.75059	634.056	0.352941	12595.3	1382.35	4597.65	33303.5
129	Zn	90	µM	90_µM	120	Victim	4.68495	715.275		10812	1807.63	7834.11	44789.3
130	Zn	90	µM	90_µM	63	Victim	5.28189	571.483	0.252135	13054.5	1290.13	4725.77	25746.1
131	Zn	60	µM	60_µM	105	Victim	4.6847	607.812	0.248337	11366.7	1275.21	4298	25138.8
132	Zn	60	µM	60_µM	39	Victim	5.20697	557.679	0.23962	14237.7	1251.22	5218.38	23018.7
133	Zn	60	µM	60_µM	90	Victim	6.20541	840.09		14063.3	1731.27	7181.47	32061.8
134	Zn	60	µM	60_µM	42	Victim	4.95797	589.527	0.232911	15323.5	1468.15	5701.27	29808.6
135	Zn	60	µM	60_µM	78	Victim	5.23016	721.878		11774.4	1472.79	5665.57	31097.7
136	Zn	60	µM	60_µM	69	Victim	5.00687	688.849		15435.4	1659.71	5633.98	41239.2
137	Zn	60	µM	60_µM	63	Victim	5.02687	683.254		15104.5	1588.96	6089.55	39940.3
138	Zn	60	µM	60_µM	75	Victim	5.14353	657.864		12840	1402.59	4696.47	34320
139	Zn	60	µM	60_µM	90	Victim	4.14563	617.73		12405.8	1305.24	4438.83	31584.5
140	Zn	60	µM	60_µM	69	Victim	7.23241	657.871	0.300213	14553.5	1505.16	4759.06	35483.2
141	Zn	30	µM	30_µM	63	Victim	6.21434	576.654	0.356226	14380.4	1402.26	5675.47	29687.5
142	Zn	30	µM	30_µM	24	Victim	6.31765	584.894		16173.5	1465.88	5058.82	29982.4
143	Zn	30	µM	30_µM	42	Victim	6.20648	513.704	0.30019	13440	1319.31	4775.62	28324.6
144	Zn	30	µM	30_µM	99	Victim	6.63971	901.17		15402.2		7968.23	36875.1
145	Zn	30	µM	30_µM	162	Victim	3.57815	406.39				3426.89	19643.7
146	Zn	30	µM	30_µM	63	Victim	5.12832	587.355		14728.3	1459.42	5269.36	30284.4
147	Zn	30	µM	30_µM	162	Victim	18.316		0.685083
148	Zn	30	µM	30_µM	240	Survivor	6.49057			14943.4			53584.9
149	Zn	30	µM	30_µM	240	Survivor	5.27273			17355.8			57039
150	Zn	30	µM	30_µM	240	Survivor	5.82092			15266.9		7404.18	49466.1
151	Zn	20	µM	20_µM	240	Survivor	4.905	682.524	0.205	15500	1385	5907.5	35910
152	Zn	20	µM	20_µM	240	Survivor	6.62261	778.654		18838.3		8191.3	49481.7
153	Zn	20	µM	20_µM	240	Survivor	4.93723	657.215		16155.9	1511.27	6474.85	35471.3
154	Zn	20	µM	20_µM	240	Survivor	4.33915	500.638		15446.7	1231.16	5908.32	21760.6
155	Zn	20	µM	20_µM	240	Survivor	4.42872	714.527		15081	1382.97	6145.64	29489.2
156	Zn	20	µM	20_µM	135	Victim	5.35775	545.465	0.255399	12394.4	1349.3	5748.36	19752.1
157	Zn	20	µM	20_µM	240	Survivor	5.27439	696.253		16126.3	1407.72	5761.4	33751.6
158	Zn	20	µM	20_µM	240	Survivor	5.97137	665.7		15666.3	1395.34	6593.05	31793.9
159	Zn	20	µM	20_µM	240	Survivor	5.24489	734.21		16269.3	1417.06	6350.12	37621.9
160	Zn	20	µM	20_µM	240	Survivor	5.59109	659.893		16142.5	1454.25	5867.26	38111.4
161	Zn	10	µM	10_µM	240	Survivor	4.97692	610.054		15969.2	1387.08	6289.23	32169.2
162	Zn	10	µM	10_µM	240	Survivor	5.73128	588.769	0.190085	15822.2	1346.6	5465.98	30473.8
163	Zn	10	µM	10_µM	240	Survivor	3.99158	576.893		15549.5	1562.11	6640	41785.3
164	Zn	10	µM	10_µM	240	Survivor	4.68444	573.36		14563.6	1269.69	5578.67	32309.3
165	Zn	10	µM	10_µM	240	Survivor	5.0623	711.656		15708.9	1456.26	6179.67	41610.5
166	Zn	10	µM	10_µM	240	Survivor	5.19327	572.967	0.32	15207.5	1307.51	5552.15	29338.3
167	Zn	10	µM	10_µM	240	Survivor	5.82584	523.889	0.223596	15707.9	1335.96	5801.12	37368.5
168	Zn	10	µM	10_µM	240	Survivor	4.46667	612.34		16436.8	1390.11	5843.68	27710.3
169	Zn	10	µM	10_µM	240	Survivor	5.53486	718.011	0.266667	16197.5	1421.48	5905.34	28946.6
170	Zn	10	µM	10_µM	240	Survivor	5.52819	590.162	0.221185	15095.2	1303.55	5749.37	31600.7

## Sheet: MetalsinGills
Toxicity and bioaccumulation of Cadmium, Copper and Zinc in a direct comparison at equitoxic concentrations in common carp (Cyprinus carpio) juveniles
SampleID	SamplingDay	Element	ExposureCond	TankID	Cu_(µg/g)	Zn_(µg/g)	Cd_(µg/g)
1	1	Cu	Cu10	Cu10_A	4.11497	776.253
2	1	Cu	Cu10	Cu10_A	6.78884	1560.17
3	1	Cu	Cu10	Cu10_B	8.35714	1363.89
4	1	Cu	Cu10	Cu10_B	6.68182	672.041
5	1	Cu	Cu10	Cu10_C	7.74226	1254.01
6	1	Cu	Cu10	Cu10_C	10.248	1608.84
7	1	Cu	Cu50	Cu50_A	13.5705	1466.12
8	1	Cu	Cu50	Cu50_A	12.0387	1571.4
9	1	Cu	Cu50	Cu50_B	10.4652	1361.93
10	1	Cu	Cu50	Cu50_B	16.0555	1008.05
11	1	Cu	Cu50	Cu50_C	8.42791	1822.95
12	1	Cu	Cu50	Cu50_C	2.81918	445.933
13	1	Cd	Cd10	Cd10_A	3.84537	993.741	0.916098
14	1	Cd	Cd10	Cd10_A	9.12	2198.07	6.836
15	1	Cd	Cd10	Cd10_B	1.91553	778.402	0.503138
16	1	Cd	Cd10	Cd10_B	4.15119	1193.45	1.90678
17	1	Cd	Cd10	Cd10_C	4.68106	1014.4	1.36035
18	1	Cd	Cd10	Cd10_C	7.28813	964.618	2.49375
19	1	Cd	Cd50	Cd50_A	3.78086	952.575	4.48665
20	1	Cd	Cd50	Cd50_A	4.56831	1039.1	2.64415
21	1	Cd	Cd50	Cd50_B	2.23101	310.99	5.84807
22	1	Cd	Cd50	Cd50_B	4.78952	868.428	5.65238
23	1	Cd	Cd50	Cd50_C	4.65093	1123.82	15.6569
24	1	Cd	Cd50	Cd50_C	4.65469	1219.23	11.2767
25	1	Zn	Zn10	Zn10_A	5.12308	1062.78
26	1	Zn	Zn10	Zn10_A	5.98364	899.438
27	1	Zn	Zn10	Zn10_B	5.34279	1307.32
28	1	Zn	Zn10	Zn10_B	5.56333	1354.42
29	1	Zn	Zn10	Zn10_C	5.53339	861.787
30	1	Zn	Zn10	Zn10_C	8.76364	801.555
31	1	Zn	Zn50	Zn50_A	5.61828	1136.43
32	1	Zn	Zn50	Zn50_A	4.31143	677.924
33	1	Zn	Zn50	Zn50_B	5.14191	1100.93
34	1	Zn	Zn50	Zn50_B	6.16923	1089.26
35	1	Zn	Zn50	Zn50_C	4.90916	775.24
36	1	Zn	Zn50	Zn50_C	4.79257	928.49
37	1	Control	Control	C_A	5.92154	1215.29
38	1	Control	Control	C_A	4.83826	1279.73
39	1	Control	Control	C_B	5.00164	1157.59
40	1	Control	Control	C_B	4.62667	899.79
41	1	Control	Control	C_C	6.07714	901.999
42	1	Control	Control	C_C	5.23364	1447.55
43	3	Cu	Cu10	Cu10_A	15.5903	1156.89
44	3	Cu	Cu10	Cu10_A	7.16966	1064.83
45	3	Cu	Cu10	Cu10_B	8.71969	1305
46	3	Cu	Cu10	Cu10_B	14.5543	991.998
47	3	Cu	Cu10	Cu10_C	22.2014	1159.98
48	3	Cu	Cu10	Cu10_C	8.37621	1411.59
49	3	Cu	Cu50	Cu50_A	16.0475	1220.39
50	3	Cu	Cu50	Cu50_A	15.1779	1512.55
51	3	Cu	Cu50	Cu50_B	30.8835	1288.76
52	3	Cu	Cu50	Cu50_B	28.2844	1395.41
53	3	Cu	Cu50	Cu50_C	12.8538	1081.32
54	3	Cu	Cu50	Cu50_C	18.5296	1302.14
55	3	Cd	Cd10	Cd10_A	7.73676	1430.28	6.51243
56	3	Cd	Cd10	Cd10_A	6.66905	1407.1	5.42114
57	3	Cd	Cd10	Cd10_B	7.7832	1624.72	7.0224
58	3	Cd	Cd10	Cd10_B	11.3073	2058.08	7.33527
59	3	Cd	Cd10	Cd10_C	7.022	1546.77	7.61
60	3	Cd	Cd10	Cd10_C	6.39636	1404.45	5.64182
61	3	Cd	Cd50	Cd50_A	6.764	1695.89	21.948
62	3	Cd	Cd50	Cd50_A	6.85667	1198.82	30.0383
63	3	Cd	Cd50	Cd50_B	6.33458	1655.68	28.2224
64	3	Cd	Cd50	Cd50_B	5.98875	1620.75	18.9712
65	3	Cd	Cd50	Cd50_C	6.51238	1476.02	19.86
66	3	Cd	Cd50	Cd50_C	6.22444	2190.5	20.84
67	3	Zn	Zn10	Zn10_A	5.8178	1156.78
68	3	Zn	Zn10	Zn10_A	6.13102	1197.18
69	3	Zn	Zn10	Zn10_B	5.7566	1233.43
70	3	Zn	Zn10	Zn10_B	6.2088	1413.12
71	3	Zn	Zn10	Zn10_C	5.59448	907.347
72	3	Zn	Zn10	Zn10_C	5.44059	1733.24
73	3	Zn	Zn50	Zn50_A	5.50767	1002.55
74	3	Zn	Zn50	Zn50_A	5.92235	1429.32
75	3	Zn	Zn50	Zn50_B	5.27341	1289.34
76	3	Zn	Zn50	Zn50_B	6.42128	1460.07
77	3	Zn	Zn50	Zn50_C	5.77564	1667.14
78	3	Zn	Zn50	Zn50_C	6.20435	1496.22
79	3	Control	Control	C_A	7.036	1621.98
80	3	Control	Control	C_A	7.7475	1437.19
81	3	Control	Control	C_B	5.58039	1695.48
82	3	Control	Control	C_B	7.10267	1367.61
83	3	Control	Control	C_C	21.1045	5617.33
84	3	Control	Control	C_C	1.43858	352.617
85	7	Cu	Cu10	Cu10_A	12.9667	1007.05
86	7	Cu	Cu10	Cu10_A	15.4114	2462.1
87	7	Cu	Cu10	Cu10_B	12.3888	1352.95
88	7	Cu	Cu10	Cu10_B	15.2511	1279.31
89	7	Cu	Cu10	Cu10_C	18.4555	1399.13
90	7	Cu	Cu10	Cu10_C	14.3691	1525.87
91	7	Cu	Cu50	Cu50_A	33.6912	855.933
92	7	Cu	Cu50	Cu50_A	38.7615	967.574
93	7	Cu	Cu50	Cu50_B	42.3966	1536.26
94	7	Cu	Cu50	Cu50_B	52.5576	1114.9
95	7	Cu	Cu50	Cu50_C	49.2279	1453.72
96	7	Cu	Cu50	Cu50_C	36.6255	1138.69
97	7	Cd	Cd10	Cd10_A	6.63761	999.873	6.28746
98	7	Cd	Cd10	Cd10_A	6.3576	1541.8	14.2884
99	7	Cd	Cd10	Cd10_B	6.64557	1184.38	8.25157
100	7	Cd	Cd10	Cd10_B	6.88444	848.138	7.04778
101	7	Cd	Cd10	Cd10_C	6.42103	990.633	9.03724
102	7	Cd	Cd10	Cd10_C	7.11643	1271.98	14.4579
103	7	Cd	Cd50	Cd50_A	5.7585	1637.66	27.7305
104	7	Cd	Cd50	Cd50_A	6.53094	1616.4	38.914
105	7	Cd	Cd50	Cd50_B	6.12098	1013.96	22.7833
106	7	Cd	Cd50	Cd50_B	5.23059	1010.34	24.8941
107	7	Cd	Cd50	Cd50_C	6.52415	1315.06	35.0411
108	7	Cd	Cd50	Cd50_C	6.40312	1117.12	32.235
109	7	Zn	Zn10	Zn10_A	6.3	1275.53
110	7	Zn	Zn10	Zn10_A	5.99526	1250.36
111	7	Zn	Zn10	Zn10_B	6.34057	1180.5
112	7	Zn	Zn10	Zn10_B	7.08207	1509.95
113	7	Zn	Zn10	Zn10_C	6.58246	1304.94
114	7	Zn	Zn10	Zn10_C	6.75462	1467.36
115	7	Zn	Zn50	Zn50_A	6.03619	1287.36
116	7	Zn	Zn50	Zn50_A	6.42625	1953.76
117	7	Zn	Zn50	Zn50_B	6.16719	1514.17
118	7	Zn	Zn50	Zn50_B	6.97714	1509.88
119	7	Zn	Zn50	Zn50_C	5.15297	1736.59
120	7	Zn	Zn50	Zn50_C	5.69085	1564.05
121	7	Control	Control	C_A	6.35793	1329.68
122	7	Control	Control	C_A	6.755	1040.92
123	7	Control	Control	C_B	9.41739	1122.26
124	7	Control	Control	C_B	5.757	250.597
125	7	Control	Control	C_C	5.14901	1309.54
126	7	Control	Control	C_C	6.24387	1127.39

## Sheet: SQ-scoringofHistopath
	Toxicity and bioaccumulation of Cadmium, Copper and Zinc in a direct comparison at equitoxic concentrations in common carp (Cyprinus carpio) juveniles
	Vyshal Delahaut, Božidar Rašković, Marta Satorres Salvado, Lieven Bervoets, Ronny Blust, Gudrun De Boeck
Sample ID	Fish from exposed group	Telangiectasis	Hyperemia	Hyperthrophy	Necrosis	Oedema of secondary epithelium	Hyperplasia of epithelium	Oedema of primary epithelium	Structural and architectural alterations	Proliferation of goblet cells	Presence of goblet cells in secondary lamellae	Infiltration	Gill index progressive changes	Gill index circulatory changes	Gill index regressive changes	Gill index inflammatory changes	Gill total histopathological index
85	Cu10	0	6	2	2	0	4	2	6	4	0	0	14	8	12	0	34
86	Cu10	0	4	2	0	6	0	0	2	0	0	4	2	4	8	8	22
87	Cu10	0	6	2	0	0	2	0	4	0	0	0	6	6	4	0	16
88	Cu10	0	2	0	0	2	0	0	0	0	0	0	0	2	2	0	4
89	Cu10	2	4	2	0	2	2	0	2	2	0	2	8	6	4	4	22
90	Cu10	0	2	0	0	2	2	0	0	0	0	0	4	2	2	0	8
91	Cu50	0	0	4	0	4	4	0	4	2	0	0	14	0	8	0	22
92	Cu50	2	0	2	0	6	0	0	2	2	0	0	4	2	8	0	14
93	Cu50	0	0	4	0	2	0	0	4	4	2	0	8	0	8	0	16
94	Cu50	0	0	2	0	0	0	0	2	2	2	0	4	0	4	0	8
95	Cu50	0	0	4	2	4	0	0	2	0	0	0	4	0	12	0	16
96	Cu50	0	2	0	0	6	0	0	2	0	0	0	0	2	8	0	10
97	Cd10	0	2	2	0	2	2	2	2	0	0	4	6	4	4	8	22
98	Cd10	0	2	0	0	2	0	4	4	0	0	0	0	6	6	0	12
99	Cd10	0	6	0	0	2	0	0	2	0	0	4	0	6	4	8	18
100	Cd10	0	2	0	0	2	0	2	2	0	0	2	0	4	4	4	12
101	Cd10	0	4	0	0	2	2	0	2	0	0	0	4	4	4	0	12
102	Cd10	0	4	0	0	0	0	0	2	0	0	0	0	4	2	0	6
103	Cd50	0	2	0	0	2	0	2	2	2	0	0	2	4	4	0	10
104	Cd50	0	6	0	2	2	2	4	4	0	0	2	4	10	12	4	30
105	Cd50	0	0	0	2	4	0	6	2	0	0	0	0	6	12	0	18
106	Cd50	0	6	0	0	6	2	6	6	2	0	4	6	12	12	8	38
107	Cd50	0	2	0	0	6	0	4	2	2	0	0	2	6	8	0	16
108	Cd50	0	0	0	0	2	0	2	4	0	0	0	0	2	6	0	8
109	Zn10	0	0	0	0	2	0	2	0	0	0	0	0	2	2	0	4
110	Zn10	0	2	2	0	2	2	4	2	0	0	0	6	6	4	0	16
111	Zn10	0	2	2	0	4	0	4	2	0	0	0	2	6	6	0	14
112	Zn10	0	2	0	0	2	2	2	2	0	0	0	4	4	4	0	12
113	Zn10	0	2	2	0	4	0	2	2	0	0	2	2	4	6	4	16
114	Zn10	0	2	0	0	2	0	2	2	0	0	2	0	4	4	4	12
115	Zn50	0	2	2	0	2	0	0	2	0	0	0	2	2	4	0	8
116	Zn50	2	2	0	0	2	0	0	2	2	0	0	2	4	4	0	10
117	Zn50	0	2	0	0	4	0	4	2	0	0	0	0	6	6	0	12
118	Zn50	0	0	0	0	2	0	4	0	0	0	0	0	4	2	0	6
119	Zn50	0	2	2	0	0	2	4	2	0	0	0	6	6	2	0	14
120	Zn50	0	2	0	2	0	0	2	2	0	0	0	0	4	8	0	12
121	Con	0	2	0	0	0	0	0	0	2	0	0	2	2	0	0	4
122	Con	0	0	0	0	0	0	0	0	0	2	0	0	0	2	0	2
123	Con	0	0	0	0	2	0	0	2	0	0	0	0	0	4	0	4
124	Con	0	0	0	0	2	0	0	2	0	0	0	0	0	4	0	4
125	Con	0	2	0	0	2	2	0	0	2	0	0	6	2	2	0	10
126	Con	0	0	0	0	0	0	0	0	2	0	0	2	0	0	0	2
	Supplementary Table - Raw data sets of semi-quantitative histopathological alterations used in this study - values per fish
